# Supplementary material for: Division of labor in honey bees is associated with transcriptional regulatory plasticity in the brain
Source: Oxford University Press journal article supplement (doi:10.1242/jeb.200196), 2019-01-01
Supplement: jeb200196supp.pdf [file jeb200196supp.pdf]

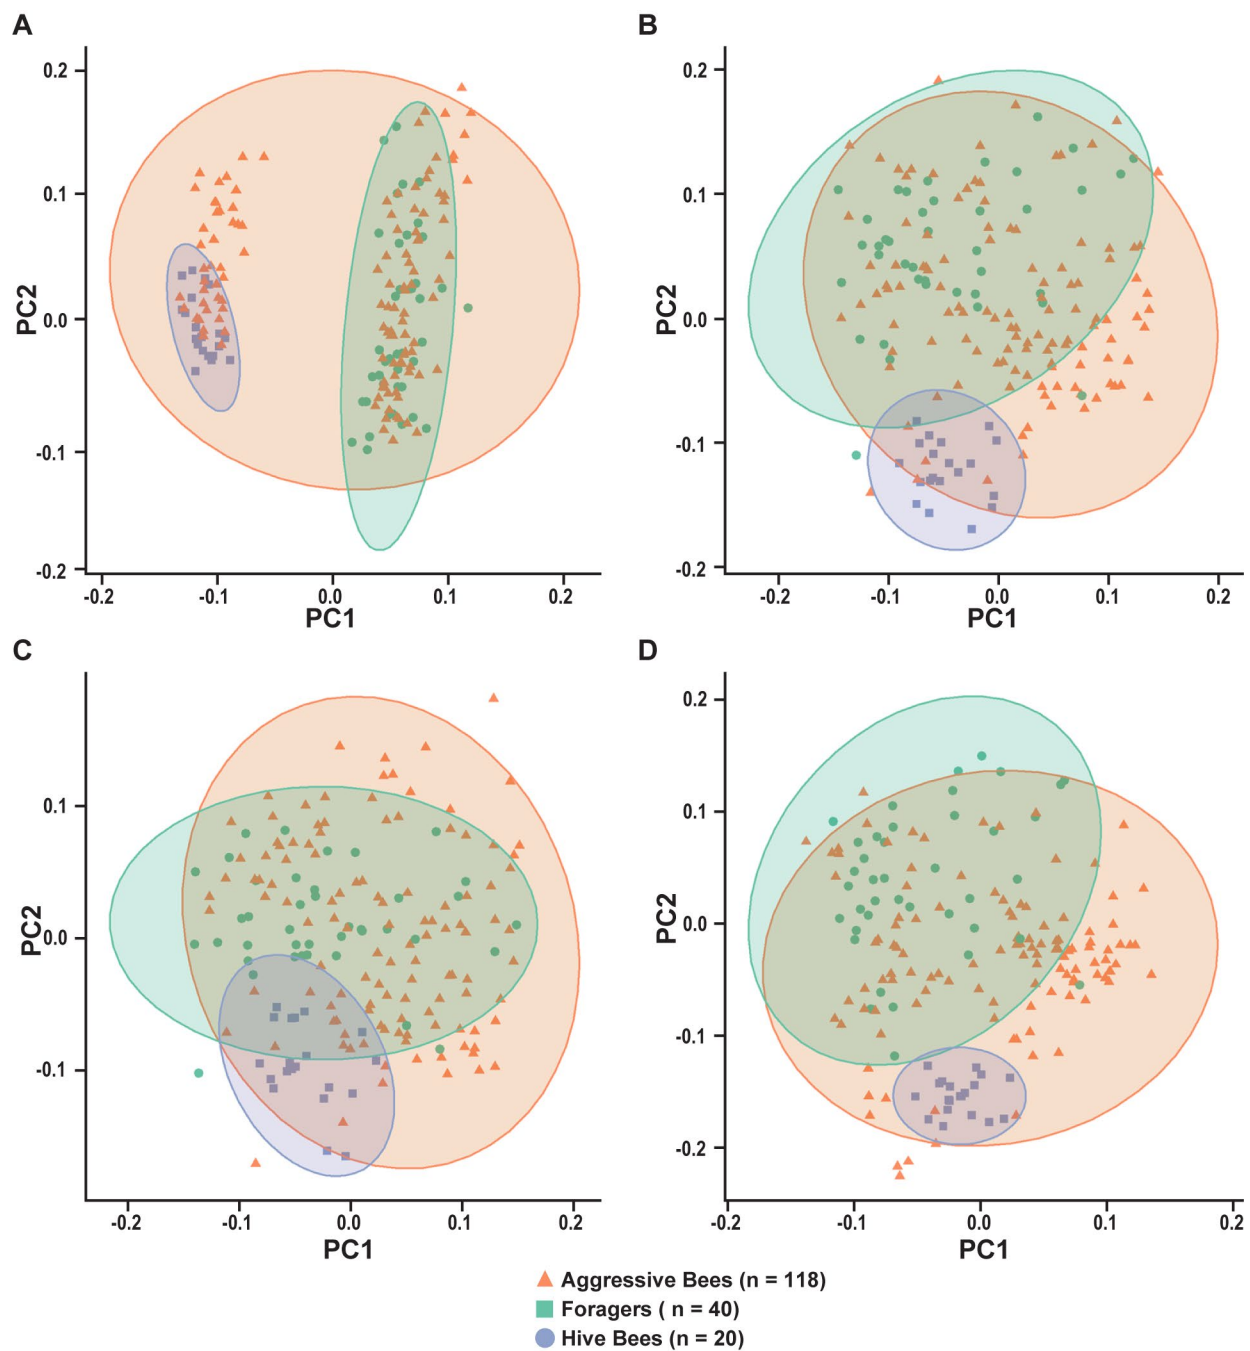

**Figure S1: RUVcorr corrects for batch-wise variation prior to ANCOVA.**

(A) Principal Component Analysis (PCA) revealed substantial batch effects between microarray datasets, which are conflated with the behavioral states (aggressive bees, hive bees and foragers) assayed. (B) To prevent this from affecting the ANCOVAs, we applied the RUVcorr package,

which largely eliminated the batch effects along the first two principal components. To determine whether remaining batch effects were likely to bias analyses of transcriptional regulatory plasticity, we performed PCA separately on putative target genes (C) and the transcriptomic background (the rest of the probes on the original microarrays) (D). Both sets of genes resulted in similar patterns of variance distribution, suggesting that neither set was unduly biased by batch effects. Shaded areas represent the 95% confidence intervals for each group.

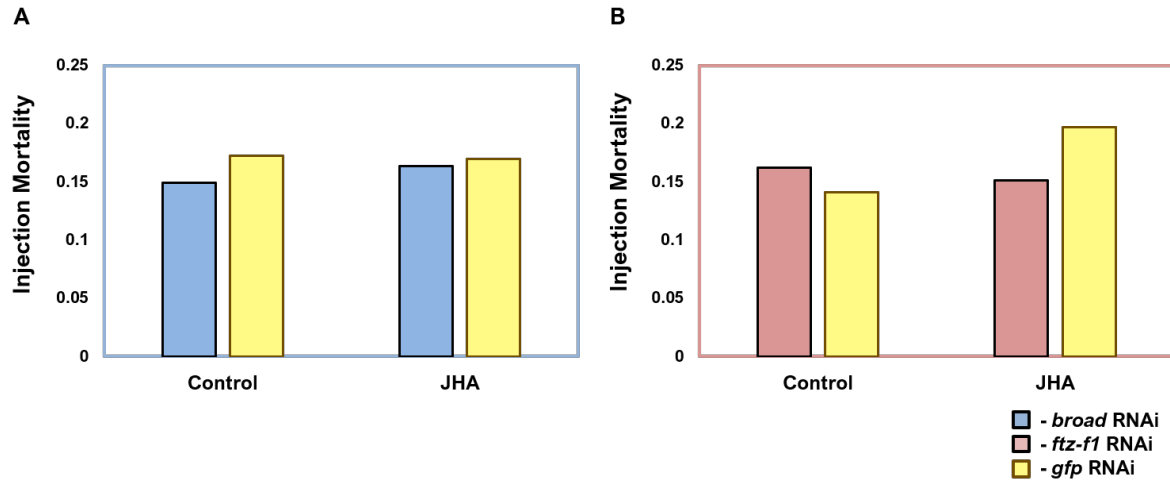

**Figure S2: Effect of RNAi brain injection on mortality.**

Low mortality was observed on the day of behavioral testing (48 hours after RNAi injection) for experiments contrasting *br* and *gfp* RNAi (A), and *ftz-f1* and *gfp* RNAi (B). No significant differences in mortality were found between RNAi or JHA treatment groups (Kruskal-Wallis test).

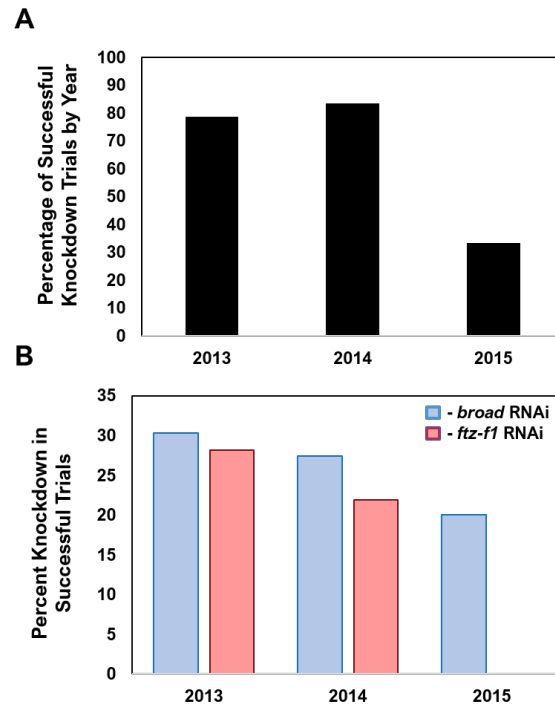

**Figure S3: Diminished efficacy of RNAi treatment in trials conducted in 2015 relative to 2013 and 2014.**

(A) RNAi was effective in 11 out of 14 trials performed in 2013 and 5 out of 6 performed in 2014. We wish to add to the literature the observation that effect strength declined in 2015, after the experiments for this study were performed. We speculate that the reason for this decline might be related to world-wide declines in bee health, especially the increase in bee viruses during this time, but the precise mechanism is unknown. Although RNAi in honey bees has been effectively administered to adult bees by multiple laboratories including our own using abdominal (Ament et al., 2012; Ament et al., 2011; Guidugli et al., 2005; Wang et al., 2012) and brain (Farooqui et al., 2003; Müßig et al., 2010; Rein et al., 2013) and targeting *ftz-f1* in pharate adults (Mello et al., 2018), potential users of this technique should be mindful of the above-noted variation.

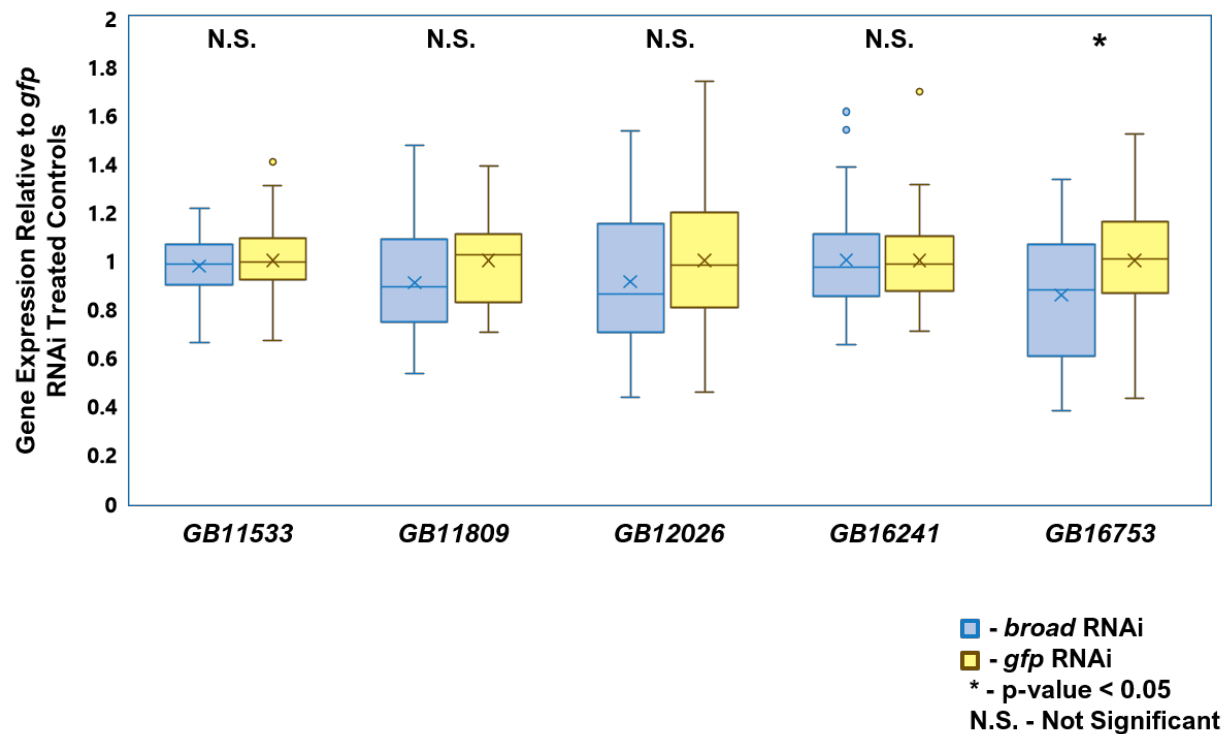

**Figure S4: Broad RNAi has reduced influence on the expression of putative CG17912 target genes.**

To explore whether *broad* RNAi brain injection had nonspecific effects on gene expression, we tested whether five putative target genes of the TF CG17912 responded to *broad* RNAi treatments. The y-axis represents gene expression of the *broad* RNAi-treated samples ( $n = 51$ ) relative to the average expression of the *gfp* treated control samples ( $n = 52$ ). Only 1 out of 5 genes was significantly affected by *broad* RNAi (ANOVA,  $p < 0.05$ ), providing some indication of specificity. In all box plots, center lines show the group median and x's indicate the group means; the limits represent the 25th and 75th percentiles, and whiskers extend up to 1.5 times the interquartile range from these percentiles.

**Table S1: Nucleotide sequences for qPCR probes and RNAi constructs used in this study**

| Table S1. Nucleotide sequences for qPCR probes and RNAi constructs used in this study |         |                             |                            |
|---------------------------------------------------------------------------------------|---------|-----------------------------|----------------------------|
| Gene Name                                                                             | OGS 2.0 | qPCR Forward Primer         | qPCR Reverse Primer        |
| <i>RCP1</i>                                                                           | -       | TCAATTAAC TCGGAATCGGA       | CCTGGATTCCCTGCTGAT         |
| <i>RP49</i>                                                                           | GB10903 | GGGACAATATTTGATGCCCAAT      | CTTGACATTATGTACCAAACTTTTCT |
| <i>S8</i>                                                                             | GB12747 | TGAGTGTCTGCTATGGATTGCA      | TCGCGGCTCGTGGTAAA          |
| <i>GAPDH</i>                                                                          | GB14798 | ACTGGTATGGCCTTCCTGTAC       | TGCCAAGTCTAACTGTTAAGTCAACA |
| <i>EiF1a</i>                                                                          | GB16844 | CAATTTCTGGTTGGCATGGA        | CATCCCTTAAACCAAGGCATTT     |
| <i>broad</i>                                                                          | GB30150 | AGAAGCCGAGGGTGCTGTC         | CATCGAGAAATCGGTGGGC        |
| <i>ftz-f1</i>                                                                         | GB16873 | ACCAACTACCACCTACTCATTACCAA  | GCAGACCGGACAGAGTTC TTCT    |
| <i>ERBP</i>                                                                           | GB11484 | TCACATTTGGATTATTATTCTGGACG  | AGCATCAGTCATAAGTTCATCCACA  |
|                                                                                       | GB11842 | AGTCGACCGTGGGAGTGGT         | TCTGTGGACCCAGCCTGTG        |
|                                                                                       | GB11874 | GTTTATGATGCAACGCAAAGCT      | CATTGCTGGAGCCATGAAACT      |
| <i>oys</i>                                                                            | GB15142 | ATGGCTTAGATCGATTGTGTACGA    | GGCAGAAAGGGAGTATGTGAACA    |
|                                                                                       | GB15320 | AGTGGTTTGTCTGGAACATGGA      | TGGTTGCAATTTGGTAGCTTCA     |
| <i>Nrk</i>                                                                            | GB15972 | GTATGGGCGTTGCGGGTAT         | TCTTCGTGCGTCATTCCATAAT     |
|                                                                                       | GB16117 | TCCTAAAAC TTTGCGTCACACG     | TGCCATCGTTTTAGAATTTGGA     |
| <i>TFIle<math>\alpha</math></i>                                                       | GB17516 | GTACCAACTGTAACGTGTCAGGAA    | ACAGGAGTCATTTCTGCTATTAATGC |
| <i>TyrR</i>                                                                           | GB17991 | GGCCCCCTTCGTATCGTTCA        | TGAACGGCATCACGAGGAT        |
|                                                                                       | GB14024 | TCCAGAAGAAAAATACCAAGTATCGC  | GAATCTGGAGTCACGACAAGACAA   |
| <i>unc79</i>                                                                          | GB15608 | GGTTTCATCAAAGACAGGGACAA     | TCCGGTATCGTGGTCTTGAATT     |
| <i>Toll-7</i>                                                                         | GB15177 | CTGACCTTCCTCCCGTTACG        | ACACCGGAAACGTACCAA         |
| Construct Name                                                                        |         | Antisense                   | Sense                      |
| <i>ftz-f1</i> Construct 1                                                             |         | CCACUUA GACGUUUCUUCUAGUAGUU | CUAUCAAGAAGAAACGUCUAAGUGG  |
| <i>ftz-f1</i> Construct 2                                                             |         | UUUAAAUACUAAUUGAGGUUCUUCUC  | GAAAGAACCUCUAUUAGUAUUUAAA  |
| <i>ftz-f1</i> Construct 3                                                             |         | UUGCCAUAUCUUGUCUACGUUGUCUUU | AGACAACGUAGACAAGAUUUGGCAA  |
| <i>broad</i> Construct 1                                                              |         | CGCAACAAUUGCUGCACGGUGGUCGGU | CGACCACCGUGCAGCAAUUGUUGCG  |
| <i>broad</i> Construct 2                                                              |         | ACUGCUAAGGGAACGCUGAUGCACGUU | CGUGCAUCAGCGUUCCCUUAGCAGT  |
| <i>broad</i> Construct 3                                                              |         | CGUUUAUCUGCUUUGGUAAUUGUCCA  | GAACAAUUACCAAAGCAGUAUAACG  |

## References

**Ament, S. A., Blatti, C. A., Alaux, C., Wheeler, M. M., Toth, A. L., Le Conte, Y., Hunte, G. J., Guzman-Novoaf, E., DeGrandi-Hoffman, G., Uribe-Rubio, J. L. et al.** (2012). New meta-analysis tools reveal common transcriptional regulatory basis for multiple determinants of behavior. *Proceedings of the National Academy of Sciences of the United States of America* **109**, E1801-E1810.

**Ament, S. A., Chan, Q. W., Wheeler, M. M., Nixon, S. E., Johnson, S. P., Rodriguez-Zas, S. L., Foster, L. J. and Robinson, G. E.** (2011). Mechanisms of stable lipid loss in a social insect. *Journal of Experimental Biology* **214**, 3808-3821.

**Farooqui, T., Robinson, K., Vaessin, H. and Smith, B. H.** (2003). Modulation of early olfactory processing by an octopaminergic reinforcement pathway in the honeybee. *Journal of Neuroscience* **23**, 5370-5380.

**Guidugli, K. R., Nascimento, A. M., Amdam, G. V., Barchuk, A. R., Omholt, S., Simoes, Z. L. P. and Hartfelder, K.** (2005). Vitellogenin regulates hormonal dynamics in the worker caste of a eusocial insect. *Febs Letters* **579**, 4961-4965.

**Mello, T. R. P., Aleixo, A. C., Pinheiro, D. G., Nunes, F. M. F., Cristino, A. S., Bitondi, M. M. G., Barchuk, A. R. and Simoes, Z. L. P.** (2018). Hormonal control and target genes of ftz-f1 expression in the honeybee *Apis mellifera*: a positive loop linking juvenile hormone, ftz-f1, and vitellogenin. *Insect Mol Biol.*

**Müßig, L., Richlitzki, A., Rößler, R., Eisenhardt, D., Menzel, R. and Lebouille, G.** (2010). Acute disruption of the NMDA receptor subunit NR1 in the honeybee brain selectively impairs memory formation. *The Journal of Neuroscience* **30**, 7817-7825.

**Rein, J., Mustard, J. A., Strauch, M., Smith, B. H. and Galizia, C. G.** (2013). Octopamine modulates activity of neural networks in the honey bee antennal lobe. *Journal of Comparative Physiology. A, Neuroethology, Sensory, Neural, and Behavioral Physiology* **199**, 947-962.

**Wang, Y., Brent, C. S., Fennern, E. and Amdam, G. V.** (2012). Gustatory perception and fat body energy metabolism are jointly affected by Vitellogenin and Juvenile Hormone in honey bees. *Plos Genetics* **8**, 13.
